# Supplementary material for: Pathways to personalized medicine—Embracing heterogeneity for progress in clinical therapeutics research in Alzheimer's disease
Source: PubMed Central journal article supplement — Alzheimers Dement. 2024 Sep 6;20(10):7384–94. doi: 10.1002/alz.14063 (PMC11485305; doi:10.1002/alz.14063), 2024-09-06
Supplement: ALZ-20-7384-s001.pdf [file ALZ-20-7384-s001.pdf]

## ICMJE DISCLOSURE FORM

**Date:** April 16, 2024

**Your Name:** Steven E. Arnold

**Manuscript Title:** Pathways to Personalized Medicine - Embracing Heterogeneity for Progress in Clinical Therapeutics Research in Alzheimer's Disease

**Manuscript Number (if known):** ADJ-D-24-00336

In the interest of transparency, we ask you to disclose all relationships/activities/interests listed below that are related to the content of your manuscript. "Related" means any relation with for-profit or not-for-profit third parties whose interests may be affected by the content of the manuscript. Disclosure represents a commitment to transparency and does not necessarily indicate a bias. If you are in doubt about whether to list a relationship/activity/interest, it is preferable that you do so.

The author's relationships/activities/interests should be defined broadly. For example, if your manuscript pertains to the epidemiology of hypertension, you should declare all relationships with manufacturers of antihypertensive medication, even if that medication is not mentioned in the manuscript.

In item #1 below, report all support for the work reported in this manuscript without time limit. For all other items, the time frame for disclosure is the past 36 months.

|                                                                                                                                                                                         | Name all entities with whom you have this relationship or indicate none (add rows as needed)                                                                                                                                                                                                                                                                                                                                                                                                                                                                         | Specifications/Comments (e.g., if payments were made to you or to your institution)                                                                       |                    |                                                                                                                                                         |                    |                                           |  |  |
|-----------------------------------------------------------------------------------------------------------------------------------------------------------------------------------------|----------------------------------------------------------------------------------------------------------------------------------------------------------------------------------------------------------------------------------------------------------------------------------------------------------------------------------------------------------------------------------------------------------------------------------------------------------------------------------------------------------------------------------------------------------------------|-----------------------------------------------------------------------------------------------------------------------------------------------------------|--------------------|---------------------------------------------------------------------------------------------------------------------------------------------------------|--------------------|-------------------------------------------|--|--|
| Time frame: Since the initial planning of the work                                                                                                                                      |                                                                                                                                                                                                                                                                                                                                                                                                                                                                                                                                                                      |                                                                                                                                                           |                    |                                                                                                                                                         |                    |                                           |  |  |
| <b>1</b> All support for the present manuscript (e.g., funding, provision of study materials, medical writing, article processing charges, etc.)<br><b>No time limit for this item.</b> | <input type="checkbox"/> None<br><br><table border="1" style="width: 100%; border-collapse: collapse;"> <tr> <td style="width: 60%;">Challenger Foundation</td> <td>institution</td> </tr> <tr> <td>NIH P30 AG062421</td> <td>institution</td> </tr> <tr> <td colspan="2" style="text-align: center; color: gray; font-size: small;">Click the tab key to add additional rows.</td> </tr> </table>                                                                                                                                                                   | Challenger Foundation                                                                                                                                     | institution        | NIH P30 AG062421                                                                                                                                        | institution        | Click the tab key to add additional rows. |  |  |
| Challenger Foundation                                                                                                                                                                   | institution                                                                                                                                                                                                                                                                                                                                                                                                                                                                                                                                                          |                                                                                                                                                           |                    |                                                                                                                                                         |                    |                                           |  |  |
| NIH P30 AG062421                                                                                                                                                                        | institution                                                                                                                                                                                                                                                                                                                                                                                                                                                                                                                                                          |                                                                                                                                                           |                    |                                                                                                                                                         |                    |                                           |  |  |
| Click the tab key to add additional rows.                                                                                                                                               |                                                                                                                                                                                                                                                                                                                                                                                                                                                                                                                                                                      |                                                                                                                                                           |                    |                                                                                                                                                         |                    |                                           |  |  |
| Time frame: past 36 months                                                                                                                                                              |                                                                                                                                                                                                                                                                                                                                                                                                                                                                                                                                                                      |                                                                                                                                                           |                    |                                                                                                                                                         |                    |                                           |  |  |
| <b>2</b> Grants or contracts from any entity (if not indicated in item #1 above).                                                                                                       | <input type="checkbox"/> None<br><br><table border="1" style="width: 100%; border-collapse: collapse;"> <tr> <td style="width: 60%;">Alzheimer's Association<br/>Alzheimer's Drug Discovery Foundation<br/>John Sperling Foundation<br/>National Institutes of Health (various)<br/>Prion Alliance</td> <td>all to institution</td> </tr> <tr> <td>AbbVie, Inc<br/>AC Immune SA<br/>Amylyx, Inc<br/>Athira Pharma, Inc<br/>Cyclerion Therapeutics, Inc.<br/>EIP Pharma, Inc.<br/>Janssen, Johnson &amp; Johnson, Inc</td> <td>all to institution</td> </tr> </table> | Alzheimer's Association<br>Alzheimer's Drug Discovery Foundation<br>John Sperling Foundation<br>National Institutes of Health (various)<br>Prion Alliance | all to institution | AbbVie, Inc<br>AC Immune SA<br>Amylyx, Inc<br>Athira Pharma, Inc<br>Cyclerion Therapeutics, Inc.<br>EIP Pharma, Inc.<br>Janssen, Johnson & Johnson, Inc | all to institution |                                           |  |  |
| Alzheimer's Association<br>Alzheimer's Drug Discovery Foundation<br>John Sperling Foundation<br>National Institutes of Health (various)<br>Prion Alliance                               | all to institution                                                                                                                                                                                                                                                                                                                                                                                                                                                                                                                                                   |                                                                                                                                                           |                    |                                                                                                                                                         |                    |                                           |  |  |
| AbbVie, Inc<br>AC Immune SA<br>Amylyx, Inc<br>Athira Pharma, Inc<br>Cyclerion Therapeutics, Inc.<br>EIP Pharma, Inc.<br>Janssen, Johnson & Johnson, Inc                                 | all to institution                                                                                                                                                                                                                                                                                                                                                                                                                                                                                                                                                   |                                                                                                                                                           |                    |                                                                                                                                                         |                    |                                           |  |  |

|          |                                                                                                              | Name all entities with whom you have this relationship or indicate none (add rows as needed) | Specifications/Comments (e.g., if payments were made to you or to your institution) |
|----------|--------------------------------------------------------------------------------------------------------------|----------------------------------------------------------------------------------------------|-------------------------------------------------------------------------------------|
|          |                                                                                                              | Ionis Pharmaceuticals<br>Novartis AG<br>Seer Biosciences<br>Superfluid Dx                    | all to institution                                                                  |
| <b>3</b> | Royalties or licenses                                                                                        | <input checked="" type="checkbox"/> <b>None</b>                                              |                                                                                     |
|          |                                                                                                              |                                                                                              |                                                                                     |
|          |                                                                                                              |                                                                                              |                                                                                     |
| <b>4</b> | Consulting fees                                                                                              | <input type="checkbox"/> <b>None</b>                                                         |                                                                                     |
|          |                                                                                                              | Daewoong Pharmaceutical Co.                                                                  | all personal consulting fees                                                        |
|          |                                                                                                              | Risen Pharmaceutical Technology Co.                                                          | all personal consulting fees                                                        |
|          |                                                                                                              | Allyx Therapeutics, Inc.<br>BioVie, Inc.<br>Cassava Sciences                                 | all personal consulting fees                                                        |
|          |                                                                                                              | Vandria<br>Boyle Shaughnessy Law<br>Foster & Eldredge                                        | all personal consulting fees                                                        |
| <b>5</b> | Payment or honoraria for lectures, presentations, speakers bureaus, manuscript writing or educational events | <input type="checkbox"/> <b>None</b>                                                         |                                                                                     |
|          |                                                                                                              | Eisai                                                                                        | personal honorarium                                                                 |
|          |                                                                                                              | Bob's Last Marathon                                                                          | personal honorarium                                                                 |
|          |                                                                                                              |                                                                                              |                                                                                     |
| <b>6</b> | Payment for expert testimony                                                                                 | <input checked="" type="checkbox"/> <b>None</b>                                              |                                                                                     |
|          |                                                                                                              |                                                                                              |                                                                                     |
|          |                                                                                                              |                                                                                              |                                                                                     |
| <b>7</b> | Support for attending meetings and/or travel                                                                 | <input checked="" type="checkbox"/> <b>None</b>                                              |                                                                                     |
|          |                                                                                                              |                                                                                              |                                                                                     |
|          |                                                                                                              |                                                                                              |                                                                                     |

|                                                                                                                                                                                                                                                               |                                                                                                   | Name all entities with whom you have this relationship or indicate none (add rows as needed) | Specifications/Comments (e.g., if payments were made to you or to your institution) |
|---------------------------------------------------------------------------------------------------------------------------------------------------------------------------------------------------------------------------------------------------------------|---------------------------------------------------------------------------------------------------|----------------------------------------------------------------------------------------------|-------------------------------------------------------------------------------------|
| <b>8</b>                                                                                                                                                                                                                                                      | Patents planned, issued or pending                                                                | <input checked="" type="checkbox"/> <b>None</b>                                              |                                                                                     |
|                                                                                                                                                                                                                                                               |                                                                                                   |                                                                                              |                                                                                     |
|                                                                                                                                                                                                                                                               |                                                                                                   |                                                                                              |                                                                                     |
| <b>9</b>                                                                                                                                                                                                                                                      | Participation on a Data Safety Monitoring Board or Advisory Board                                 | <input type="checkbox"/> <b>None</b>                                                         |                                                                                     |
|                                                                                                                                                                                                                                                               |                                                                                                   | Quince Therapeutics/Cortexyme, Inc                                                           | personal honorarium                                                                 |
|                                                                                                                                                                                                                                                               |                                                                                                   |                                                                                              |                                                                                     |
|                                                                                                                                                                                                                                                               |                                                                                                   |                                                                                              |                                                                                     |
| <b>10</b>                                                                                                                                                                                                                                                     | Leadership or fiduciary role in other board, society, committee or advocacy group, paid or unpaid | <input checked="" type="checkbox"/> <b>None</b>                                              |                                                                                     |
|                                                                                                                                                                                                                                                               |                                                                                                   |                                                                                              |                                                                                     |
|                                                                                                                                                                                                                                                               |                                                                                                   |                                                                                              |                                                                                     |
| <b>11</b>                                                                                                                                                                                                                                                     | Stock or stock options                                                                            | <input checked="" type="checkbox"/> <b>None</b>                                              |                                                                                     |
|                                                                                                                                                                                                                                                               |                                                                                                   |                                                                                              |                                                                                     |
|                                                                                                                                                                                                                                                               |                                                                                                   |                                                                                              |                                                                                     |
| <b>12</b>                                                                                                                                                                                                                                                     | Receipt of equipment, materials, drugs, medical writing, gifts or other services                  | <input type="checkbox"/> <b>None</b>                                                         |                                                                                     |
|                                                                                                                                                                                                                                                               |                                                                                                   | Meso Scale Discovery                                                                         | institutional receipt of reagents                                                   |
|                                                                                                                                                                                                                                                               |                                                                                                   | Chromadex, Inc                                                                               | institutional receipt of dietary supplement for clinical trial                      |
|                                                                                                                                                                                                                                                               |                                                                                                   |                                                                                              |                                                                                     |
| <b>13</b>                                                                                                                                                                                                                                                     | Other financial or non-financial interests                                                        | <input checked="" type="checkbox"/> <b>None</b>                                              |                                                                                     |
|                                                                                                                                                                                                                                                               |                                                                                                   |                                                                                              |                                                                                     |
|                                                                                                                                                                                                                                                               |                                                                                                   |                                                                                              |                                                                                     |
| <p><b>Please place an "X" next to the following statement to indicate your agreement:</b></p> <p><input checked="" type="checkbox"/> I certify that I have answered every question and have not altered the wording of any of the questions on this form.</p> |                                                                                                   |                                                                                              |                                                                                     |

## ICMJE DISCLOSURE FORM

**Date:** 4/15/2024

**Your Name:** Bradley Hyman

**Manuscript Title:** Pathways to Personalized Medicine - Embracing Heterogeneity for Progress in Clinical Therapeutics Research in Alzheimer's Disease

**Manuscript Number (if known):** ADJ-D-24-00336

In the interest of transparency, we ask you to disclose all relationships/activities/interests listed below that are related to the content of your manuscript. "Related" means any relation with for-profit or not-for-profit third parties whose interests may be affected by the content of the manuscript. Disclosure represents a commitment to transparency and does not necessarily indicate a bias. If you are in doubt about whether to list a relationship/activity/interest, it is preferable that you do so.

The author's relationships/activities/interests should be defined broadly. For example, if your manuscript pertains to the epidemiology of hypertension, you should declare all relationships with manufacturers of antihypertensive medication, even if that medication is not mentioned in the manuscript.

In item #1 below, report all support for the work reported in this manuscript without time limit. For all other items, the time frame for disclosure is the past 36 months.

|                                                                                                                                                                                         | Name all entities with whom you have this relationship or indicate none (add rows as needed)                                                                                                                                                                                                                                                                                                                                                                                               | Specifications/Comments (e.g., if payments were made to you or to your institution) |                |           |                |                |                |                                                          |                |        |                |     |                |               |  |  |
|-----------------------------------------------------------------------------------------------------------------------------------------------------------------------------------------|--------------------------------------------------------------------------------------------------------------------------------------------------------------------------------------------------------------------------------------------------------------------------------------------------------------------------------------------------------------------------------------------------------------------------------------------------------------------------------------------|-------------------------------------------------------------------------------------|----------------|-----------|----------------|----------------|----------------|----------------------------------------------------------|----------------|--------|----------------|-----|----------------|---------------|--|--|
| Time frame: Since the initial planning of the work                                                                                                                                      |                                                                                                                                                                                                                                                                                                                                                                                                                                                                                            |                                                                                     |                |           |                |                |                |                                                          |                |        |                |     |                |               |  |  |
| <b>1</b> All support for the present manuscript (e.g., funding, provision of study materials, medical writing, article processing charges, etc.)<br><b>No time limit for this item.</b> | <input checked="" type="checkbox"/> <b>None</b><br><br><table border="1" style="width: 100%; border-collapse: collapse;"> <tr><td style="height: 20px;"> </td><td style="width: 40%;"> </td></tr> <tr><td style="height: 20px;"> </td><td> </td></tr> <tr><td style="height: 20px;"> </td><td> </td></tr> </table>                                                                                                                                                                         |                                                                                     |                |           |                |                |                | <small>Click the tab key to add additional rows.</small> |                |        |                |     |                |               |  |  |
|                                                                                                                                                                                         |                                                                                                                                                                                                                                                                                                                                                                                                                                                                                            |                                                                                     |                |           |                |                |                |                                                          |                |        |                |     |                |               |  |  |
|                                                                                                                                                                                         |                                                                                                                                                                                                                                                                                                                                                                                                                                                                                            |                                                                                     |                |           |                |                |                |                                                          |                |        |                |     |                |               |  |  |
|                                                                                                                                                                                         |                                                                                                                                                                                                                                                                                                                                                                                                                                                                                            |                                                                                     |                |           |                |                |                |                                                          |                |        |                |     |                |               |  |  |
| Time frame: past 36 months                                                                                                                                                              |                                                                                                                                                                                                                                                                                                                                                                                                                                                                                            |                                                                                     |                |           |                |                |                |                                                          |                |        |                |     |                |               |  |  |
| <b>2</b> Grants or contracts from any entity (if not indicated in item #1 above).                                                                                                       | <input type="checkbox"/> <b>None</b><br><br><table border="1" style="width: 100%; border-collapse: collapse;"> <tr><td style="width: 60%;">NIH</td><td>To institution</td></tr> <tr><td>Rainwater</td><td>To institution</td></tr> <tr><td>JPB foundation</td><td>To institution</td></tr> <tr><td>Biogen</td><td>To institution</td></tr> <tr><td>Abbvie</td><td>To institution</td></tr> <tr><td>BMS</td><td>To institution</td></tr> <tr><td>Cure Alz Fund</td><td> </td></tr> </table> | NIH                                                                                 | To institution | Rainwater | To institution | JPB foundation | To institution | Biogen                                                   | To institution | Abbvie | To institution | BMS | To institution | Cure Alz Fund |  |  |
| NIH                                                                                                                                                                                     | To institution                                                                                                                                                                                                                                                                                                                                                                                                                                                                             |                                                                                     |                |           |                |                |                |                                                          |                |        |                |     |                |               |  |  |
| Rainwater                                                                                                                                                                               | To institution                                                                                                                                                                                                                                                                                                                                                                                                                                                                             |                                                                                     |                |           |                |                |                |                                                          |                |        |                |     |                |               |  |  |
| JPB foundation                                                                                                                                                                          | To institution                                                                                                                                                                                                                                                                                                                                                                                                                                                                             |                                                                                     |                |           |                |                |                |                                                          |                |        |                |     |                |               |  |  |
| Biogen                                                                                                                                                                                  | To institution                                                                                                                                                                                                                                                                                                                                                                                                                                                                             |                                                                                     |                |           |                |                |                |                                                          |                |        |                |     |                |               |  |  |
| Abbvie                                                                                                                                                                                  | To institution                                                                                                                                                                                                                                                                                                                                                                                                                                                                             |                                                                                     |                |           |                |                |                |                                                          |                |        |                |     |                |               |  |  |
| BMS                                                                                                                                                                                     | To institution                                                                                                                                                                                                                                                                                                                                                                                                                                                                             |                                                                                     |                |           |                |                |                |                                                          |                |        |                |     |                |               |  |  |
| Cure Alz Fund                                                                                                                                                                           |                                                                                                                                                                                                                                                                                                                                                                                                                                                                                            |                                                                                     |                |           |                |                |                |                                                          |                |        |                |     |                |               |  |  |

|                       |                                                                                                              | Name all entities with whom you have this relationship or indicate none (add rows as needed)                                                                                                                                                                                                                                                                                                                                                                                                                                                                                                                                                                                                                                                                                            | Specifications/Comments (e.g., if payments were made to you or to your institution) |          |         |          |          |          |         |          |         |          |        |          |     |          |                |          |          |          |          |          |        |          |           |          |       |          |        |          |         |          |           |          |  |
|-----------------------|--------------------------------------------------------------------------------------------------------------|-----------------------------------------------------------------------------------------------------------------------------------------------------------------------------------------------------------------------------------------------------------------------------------------------------------------------------------------------------------------------------------------------------------------------------------------------------------------------------------------------------------------------------------------------------------------------------------------------------------------------------------------------------------------------------------------------------------------------------------------------------------------------------------------|-------------------------------------------------------------------------------------|----------|---------|----------|----------|----------|---------|----------|---------|----------|--------|----------|-----|----------|----------------|----------|----------|----------|----------|----------|--------|----------|-----------|----------|-------|----------|--------|----------|---------|----------|-----------|----------|--|
| 3                     | Royalties or licenses                                                                                        | <input checked="" type="checkbox"/> <b>None</b><br><table border="1"> <tr><td></td><td></td></tr> <tr><td></td><td></td></tr> <tr><td></td><td></td></tr> </table>                                                                                                                                                                                                                                                                                                                                                                                                                                                                                                                                                                                                                      |                                                                                     |          |         |          |          |          |         |          |         |          |        |          |     |          |                |          |          |          |          |          |        |          |           |          |       |          |        |          |         |          |           |          |  |
|                       |                                                                                                              |                                                                                                                                                                                                                                                                                                                                                                                                                                                                                                                                                                                                                                                                                                                                                                                         |                                                                                     |          |         |          |          |          |         |          |         |          |        |          |     |          |                |          |          |          |          |          |        |          |           |          |       |          |        |          |         |          |           |          |  |
|                       |                                                                                                              |                                                                                                                                                                                                                                                                                                                                                                                                                                                                                                                                                                                                                                                                                                                                                                                         |                                                                                     |          |         |          |          |          |         |          |         |          |        |          |     |          |                |          |          |          |          |          |        |          |           |          |       |          |        |          |         |          |           |          |  |
|                       |                                                                                                              |                                                                                                                                                                                                                                                                                                                                                                                                                                                                                                                                                                                                                                                                                                                                                                                         |                                                                                     |          |         |          |          |          |         |          |         |          |        |          |     |          |                |          |          |          |          |          |        |          |           |          |       |          |        |          |         |          |           |          |  |
| 4                     | Consulting fees                                                                                              | <input type="checkbox"/> <b>None</b><br><table border="1"> <tr><td>Abbvie</td><td>personal</td></tr> <tr><td>Ambagon</td><td>Personal</td></tr> <tr><td>Aprinoia</td><td>Personal</td></tr> <tr><td>Arvinas</td><td>Personal</td></tr> <tr><td>Avrobio</td><td>Personal</td></tr> <tr><td>Biogen</td><td>Personal</td></tr> <tr><td>BMS</td><td>Personal</td></tr> <tr><td>Cell Signaling</td><td>Personal</td></tr> <tr><td>Dewpoint</td><td>Personal</td></tr> <tr><td>Novartis</td><td>Personal</td></tr> <tr><td>Sanofi</td><td>Personal</td></tr> <tr><td>Safinnova</td><td>Personal</td></tr> <tr><td>Vigil</td><td>Personal</td></tr> <tr><td>Violet</td><td>Personal</td></tr> <tr><td>Voyager</td><td>Personal</td></tr> <tr><td>Wavebreak</td><td>personal</td></tr> </table> | Abbvie                                                                              | personal | Ambagon | Personal | Aprinoia | Personal | Arvinas | Personal | Avrobio | Personal | Biogen | Personal | BMS | Personal | Cell Signaling | Personal | Dewpoint | Personal | Novartis | Personal | Sanofi | Personal | Safinnova | Personal | Vigil | Personal | Violet | Personal | Voyager | Personal | Wavebreak | personal |  |
| Abbvie                | personal                                                                                                     |                                                                                                                                                                                                                                                                                                                                                                                                                                                                                                                                                                                                                                                                                                                                                                                         |                                                                                     |          |         |          |          |          |         |          |         |          |        |          |     |          |                |          |          |          |          |          |        |          |           |          |       |          |        |          |         |          |           |          |  |
| Ambagon               | Personal                                                                                                     |                                                                                                                                                                                                                                                                                                                                                                                                                                                                                                                                                                                                                                                                                                                                                                                         |                                                                                     |          |         |          |          |          |         |          |         |          |        |          |     |          |                |          |          |          |          |          |        |          |           |          |       |          |        |          |         |          |           |          |  |
| Aprinoia              | Personal                                                                                                     |                                                                                                                                                                                                                                                                                                                                                                                                                                                                                                                                                                                                                                                                                                                                                                                         |                                                                                     |          |         |          |          |          |         |          |         |          |        |          |     |          |                |          |          |          |          |          |        |          |           |          |       |          |        |          |         |          |           |          |  |
| Arvinas               | Personal                                                                                                     |                                                                                                                                                                                                                                                                                                                                                                                                                                                                                                                                                                                                                                                                                                                                                                                         |                                                                                     |          |         |          |          |          |         |          |         |          |        |          |     |          |                |          |          |          |          |          |        |          |           |          |       |          |        |          |         |          |           |          |  |
| Avrobio               | Personal                                                                                                     |                                                                                                                                                                                                                                                                                                                                                                                                                                                                                                                                                                                                                                                                                                                                                                                         |                                                                                     |          |         |          |          |          |         |          |         |          |        |          |     |          |                |          |          |          |          |          |        |          |           |          |       |          |        |          |         |          |           |          |  |
| Biogen                | Personal                                                                                                     |                                                                                                                                                                                                                                                                                                                                                                                                                                                                                                                                                                                                                                                                                                                                                                                         |                                                                                     |          |         |          |          |          |         |          |         |          |        |          |     |          |                |          |          |          |          |          |        |          |           |          |       |          |        |          |         |          |           |          |  |
| BMS                   | Personal                                                                                                     |                                                                                                                                                                                                                                                                                                                                                                                                                                                                                                                                                                                                                                                                                                                                                                                         |                                                                                     |          |         |          |          |          |         |          |         |          |        |          |     |          |                |          |          |          |          |          |        |          |           |          |       |          |        |          |         |          |           |          |  |
| Cell Signaling        | Personal                                                                                                     |                                                                                                                                                                                                                                                                                                                                                                                                                                                                                                                                                                                                                                                                                                                                                                                         |                                                                                     |          |         |          |          |          |         |          |         |          |        |          |     |          |                |          |          |          |          |          |        |          |           |          |       |          |        |          |         |          |           |          |  |
| Dewpoint              | Personal                                                                                                     |                                                                                                                                                                                                                                                                                                                                                                                                                                                                                                                                                                                                                                                                                                                                                                                         |                                                                                     |          |         |          |          |          |         |          |         |          |        |          |     |          |                |          |          |          |          |          |        |          |           |          |       |          |        |          |         |          |           |          |  |
| Novartis              | Personal                                                                                                     |                                                                                                                                                                                                                                                                                                                                                                                                                                                                                                                                                                                                                                                                                                                                                                                         |                                                                                     |          |         |          |          |          |         |          |         |          |        |          |     |          |                |          |          |          |          |          |        |          |           |          |       |          |        |          |         |          |           |          |  |
| Sanofi                | Personal                                                                                                     |                                                                                                                                                                                                                                                                                                                                                                                                                                                                                                                                                                                                                                                                                                                                                                                         |                                                                                     |          |         |          |          |          |         |          |         |          |        |          |     |          |                |          |          |          |          |          |        |          |           |          |       |          |        |          |         |          |           |          |  |
| Safinnova             | Personal                                                                                                     |                                                                                                                                                                                                                                                                                                                                                                                                                                                                                                                                                                                                                                                                                                                                                                                         |                                                                                     |          |         |          |          |          |         |          |         |          |        |          |     |          |                |          |          |          |          |          |        |          |           |          |       |          |        |          |         |          |           |          |  |
| Vigil                 | Personal                                                                                                     |                                                                                                                                                                                                                                                                                                                                                                                                                                                                                                                                                                                                                                                                                                                                                                                         |                                                                                     |          |         |          |          |          |         |          |         |          |        |          |     |          |                |          |          |          |          |          |        |          |           |          |       |          |        |          |         |          |           |          |  |
| Violet                | Personal                                                                                                     |                                                                                                                                                                                                                                                                                                                                                                                                                                                                                                                                                                                                                                                                                                                                                                                         |                                                                                     |          |         |          |          |          |         |          |         |          |        |          |     |          |                |          |          |          |          |          |        |          |           |          |       |          |        |          |         |          |           |          |  |
| Voyager               | Personal                                                                                                     |                                                                                                                                                                                                                                                                                                                                                                                                                                                                                                                                                                                                                                                                                                                                                                                         |                                                                                     |          |         |          |          |          |         |          |         |          |        |          |     |          |                |          |          |          |          |          |        |          |           |          |       |          |        |          |         |          |           |          |  |
| Wavebreak             | personal                                                                                                     |                                                                                                                                                                                                                                                                                                                                                                                                                                                                                                                                                                                                                                                                                                                                                                                         |                                                                                     |          |         |          |          |          |         |          |         |          |        |          |     |          |                |          |          |          |          |          |        |          |           |          |       |          |        |          |         |          |           |          |  |
| 5                     | Payment or honoraria for lectures, presentations, speakers bureaus, manuscript writing or educational events | <input checked="" type="checkbox"/> <b>None</b><br><table border="1"> <tr><td></td><td></td></tr> <tr><td></td><td></td></tr> <tr><td></td><td></td></tr> </table>                                                                                                                                                                                                                                                                                                                                                                                                                                                                                                                                                                                                                      |                                                                                     |          |         |          |          |          |         |          |         |          |        |          |     |          |                |          |          |          |          |          |        |          |           |          |       |          |        |          |         |          |           |          |  |
|                       |                                                                                                              |                                                                                                                                                                                                                                                                                                                                                                                                                                                                                                                                                                                                                                                                                                                                                                                         |                                                                                     |          |         |          |          |          |         |          |         |          |        |          |     |          |                |          |          |          |          |          |        |          |           |          |       |          |        |          |         |          |           |          |  |
|                       |                                                                                                              |                                                                                                                                                                                                                                                                                                                                                                                                                                                                                                                                                                                                                                                                                                                                                                                         |                                                                                     |          |         |          |          |          |         |          |         |          |        |          |     |          |                |          |          |          |          |          |        |          |           |          |       |          |        |          |         |          |           |          |  |
|                       |                                                                                                              |                                                                                                                                                                                                                                                                                                                                                                                                                                                                                                                                                                                                                                                                                                                                                                                         |                                                                                     |          |         |          |          |          |         |          |         |          |        |          |     |          |                |          |          |          |          |          |        |          |           |          |       |          |        |          |         |          |           |          |  |
| 6                     | Payment for expert testimony                                                                                 | <input type="checkbox"/> <b>None</b><br><table border="1"> <tr><td>Department of Justice</td><td>personal</td></tr> <tr><td></td><td></td></tr> <tr><td></td><td></td></tr> </table>                                                                                                                                                                                                                                                                                                                                                                                                                                                                                                                                                                                                    | Department of Justice                                                               | personal |         |          |          |          |         |          |         |          |        |          |     |          |                |          |          |          |          |          |        |          |           |          |       |          |        |          |         |          |           |          |  |
| Department of Justice | personal                                                                                                     |                                                                                                                                                                                                                                                                                                                                                                                                                                                                                                                                                                                                                                                                                                                                                                                         |                                                                                     |          |         |          |          |          |         |          |         |          |        |          |     |          |                |          |          |          |          |          |        |          |           |          |       |          |        |          |         |          |           |          |  |
|                       |                                                                                                              |                                                                                                                                                                                                                                                                                                                                                                                                                                                                                                                                                                                                                                                                                                                                                                                         |                                                                                     |          |         |          |          |          |         |          |         |          |        |          |     |          |                |          |          |          |          |          |        |          |           |          |       |          |        |          |         |          |           |          |  |
|                       |                                                                                                              |                                                                                                                                                                                                                                                                                                                                                                                                                                                                                                                                                                                                                                                                                                                                                                                         |                                                                                     |          |         |          |          |          |         |          |         |          |        |          |     |          |                |          |          |          |          |          |        |          |           |          |       |          |        |          |         |          |           |          |  |
| 7                     | Support for attending meetings and/or travel                                                                 | <input type="checkbox"/> <b>None</b><br><table border="1"> <tr><td>ADPD</td><td></td></tr> <tr><td></td><td></td></tr> <tr><td></td><td></td></tr> </table>                                                                                                                                                                                                                                                                                                                                                                                                                                                                                                                                                                                                                             | ADPD                                                                                |          |         |          |          |          |         |          |         |          |        |          |     |          |                |          |          |          |          |          |        |          |           |          |       |          |        |          |         |          |           |          |  |
| ADPD                  |                                                                                                              |                                                                                                                                                                                                                                                                                                                                                                                                                                                                                                                                                                                                                                                                                                                                                                                         |                                                                                     |          |         |          |          |          |         |          |         |          |        |          |     |          |                |          |          |          |          |          |        |          |           |          |       |          |        |          |         |          |           |          |  |
|                       |                                                                                                              |                                                                                                                                                                                                                                                                                                                                                                                                                                                                                                                                                                                                                                                                                                                                                                                         |                                                                                     |          |         |          |          |          |         |          |         |          |        |          |     |          |                |          |          |          |          |          |        |          |           |          |       |          |        |          |         |          |           |          |  |
|                       |                                                                                                              |                                                                                                                                                                                                                                                                                                                                                                                                                                                                                                                                                                                                                                                                                                                                                                                         |                                                                                     |          |         |          |          |          |         |          |         |          |        |          |     |          |                |          |          |          |          |          |        |          |           |          |       |          |        |          |         |          |           |          |  |

|                                                                                                                                                                                                                                                               |                                                                                                   | Name all entities with whom you have this relationship or indicate none (add rows as needed) | Specifications/Comments (e.g., if payments were made to you or to your institution) |
|---------------------------------------------------------------------------------------------------------------------------------------------------------------------------------------------------------------------------------------------------------------|---------------------------------------------------------------------------------------------------|----------------------------------------------------------------------------------------------|-------------------------------------------------------------------------------------|
| <b>8</b>                                                                                                                                                                                                                                                      | Patents planned, issued or pending                                                                | <input checked="" type="checkbox"/> <b>None</b>                                              |                                                                                     |
|                                                                                                                                                                                                                                                               |                                                                                                   |                                                                                              |                                                                                     |
|                                                                                                                                                                                                                                                               |                                                                                                   |                                                                                              |                                                                                     |
| <b>9</b>                                                                                                                                                                                                                                                      | Participation on a Data Safety Monitoring Board or Advisory Board                                 | <input checked="" type="checkbox"/> <b>None</b>                                              |                                                                                     |
|                                                                                                                                                                                                                                                               |                                                                                                   |                                                                                              |                                                                                     |
|                                                                                                                                                                                                                                                               |                                                                                                   |                                                                                              |                                                                                     |
| <b>10</b>                                                                                                                                                                                                                                                     | Leadership or fiduciary role in other board, society, committee or advocacy group, paid or unpaid | <input checked="" type="checkbox"/> <b>None</b>                                              |                                                                                     |
|                                                                                                                                                                                                                                                               |                                                                                                   |                                                                                              |                                                                                     |
|                                                                                                                                                                                                                                                               |                                                                                                   |                                                                                              |                                                                                     |
| <b>11</b>                                                                                                                                                                                                                                                     | Stock or stock options                                                                            | <input type="checkbox"/> <b>None</b>                                                         |                                                                                     |
|                                                                                                                                                                                                                                                               |                                                                                                   | Novartis                                                                                     | Wife's employer                                                                     |
|                                                                                                                                                                                                                                                               |                                                                                                   | Dewpoint                                                                                     | On board                                                                            |
|                                                                                                                                                                                                                                                               |                                                                                                   | Latus                                                                                        | On sci advisory board                                                               |
| <b>12</b>                                                                                                                                                                                                                                                     | Receipt of equipment, materials, drugs, medical writing, gifts or other services                  | <input type="checkbox"/> <b>None</b>                                                         |                                                                                     |
|                                                                                                                                                                                                                                                               |                                                                                                   | Boston Consulting Group                                                                      | Direct payment to Medical writer for symposium summary                              |
|                                                                                                                                                                                                                                                               |                                                                                                   |                                                                                              |                                                                                     |
|                                                                                                                                                                                                                                                               |                                                                                                   |                                                                                              |                                                                                     |
| <b>13</b>                                                                                                                                                                                                                                                     | Other financial or non-financial interests                                                        | <input checked="" type="checkbox"/> <b>None</b>                                              |                                                                                     |
|                                                                                                                                                                                                                                                               |                                                                                                   |                                                                                              |                                                                                     |
|                                                                                                                                                                                                                                                               |                                                                                                   |                                                                                              |                                                                                     |
| <p><b>Please place an "X" next to the following statement to indicate your agreement:</b></p> <p><input checked="" type="checkbox"/> I certify that I have answered every question and have not altered the wording of any of the questions on this form.</p> |                                                                                                   |                                                                                              |                                                                                     |

## ICMJE DISCLOSURE FORM

**Date:** 4/15/2024

**Your Name:** Rebecca Betensky

**Manuscript Title:** Pathways to Personalized Medicine - Embracing Heterogeneity for Progress in Clinical Therapeutics Research in Alzheimer's Disease

**Manuscript Number (if known):** ADJ-D-24-00336

In the interest of transparency, we ask you to disclose all relationships/activities/interests listed below that are related to the content of your manuscript. "Related" means any relation with for-profit or not-for-profit third parties whose interests may be affected by the content of the manuscript. Disclosure represents a commitment to transparency and does not necessarily indicate a bias. If you are in doubt about whether to list a relationship/activity/interest, it is preferable that you do so.

The author's relationships/activities/interests should be defined broadly. For example, if your manuscript pertains to the epidemiology of hypertension, you should declare all relationships with manufacturers of antihypertensive medication, even if that medication is not mentioned in the manuscript.

In item #1 below, report all support for the work reported in this manuscript without time limit. For all other items, the time frame for disclosure is the past 36 months.

|                                                           | Name all entities with whom you have this relationship or indicate none (add rows as needed)                                                                                   | Specifications/Comments (e.g., if payments were made to you or to your institution)                                                                                                                                                                                                                                                                                               |     |                |  |  |  |  |
|-----------------------------------------------------------|--------------------------------------------------------------------------------------------------------------------------------------------------------------------------------|-----------------------------------------------------------------------------------------------------------------------------------------------------------------------------------------------------------------------------------------------------------------------------------------------------------------------------------------------------------------------------------|-----|----------------|--|--|--|--|
| <b>Time frame: Since the initial planning of the work</b> |                                                                                                                                                                                |                                                                                                                                                                                                                                                                                                                                                                                   |     |                |  |  |  |  |
| <b>1</b>                                                  | All support for the present manuscript (e.g., funding, provision of study materials, medical writing, article processing charges, etc.)<br><b>No time limit for this item.</b> | <input checked="" type="checkbox"/> <b>None</b><br><table border="1" style="width: 100%; height: 40px; margin-top: 5px;"> <tr><td style="width: 50%;"></td><td style="width: 50%;"></td></tr> <tr><td></td><td></td></tr> <tr><td></td><td></td></tr> </table> <div style="font-size: small; text-align: right; margin-top: 5px;">Click the tab key to add additional rows.</div> |     |                |  |  |  |  |
|                                                           |                                                                                                                                                                                |                                                                                                                                                                                                                                                                                                                                                                                   |     |                |  |  |  |  |
|                                                           |                                                                                                                                                                                |                                                                                                                                                                                                                                                                                                                                                                                   |     |                |  |  |  |  |
|                                                           |                                                                                                                                                                                |                                                                                                                                                                                                                                                                                                                                                                                   |     |                |  |  |  |  |
| <b>Time frame: past 36 months</b>                         |                                                                                                                                                                                |                                                                                                                                                                                                                                                                                                                                                                                   |     |                |  |  |  |  |
| <b>2</b>                                                  | Grants or contracts from any entity (if not indicated in item #1 above).                                                                                                       | <input type="checkbox"/> <b>None</b><br><table border="1" style="width: 100%; height: 40px; margin-top: 5px;"> <tr><td style="width: 50%;">NIH</td><td style="width: 50%;">To institution</td></tr> <tr><td></td><td></td></tr> <tr><td></td><td></td></tr> </table>                                                                                                              | NIH | To institution |  |  |  |  |
| NIH                                                       | To institution                                                                                                                                                                 |                                                                                                                                                                                                                                                                                                                                                                                   |     |                |  |  |  |  |
|                                                           |                                                                                                                                                                                |                                                                                                                                                                                                                                                                                                                                                                                   |     |                |  |  |  |  |
|                                                           |                                                                                                                                                                                |                                                                                                                                                                                                                                                                                                                                                                                   |     |                |  |  |  |  |
| <b>3</b>                                                  | Royalties or licenses                                                                                                                                                          | <input checked="" type="checkbox"/> <b>None</b><br><table border="1" style="width: 100%; height: 40px; margin-top: 5px;"> <tr><td style="width: 50%;"></td><td style="width: 50%;"></td></tr> <tr><td></td><td></td></tr> <tr><td></td><td></td></tr> </table>                                                                                                                    |     |                |  |  |  |  |
|                                                           |                                                                                                                                                                                |                                                                                                                                                                                                                                                                                                                                                                                   |     |                |  |  |  |  |
|                                                           |                                                                                                                                                                                |                                                                                                                                                                                                                                                                                                                                                                                   |     |                |  |  |  |  |
|                                                           |                                                                                                                                                                                |                                                                                                                                                                                                                                                                                                                                                                                   |     |                |  |  |  |  |

|                                                                                        |                                                                                                              | Name all entities with whom you have this relationship or indicate none (add rows as needed)                                                                                                                                                                                                                                                                                                                       | Specifications/Comments (e.g., if payments were made to you or to your institution) |       |                                                                                        |       |                                                                                   |       |  |
|----------------------------------------------------------------------------------------|--------------------------------------------------------------------------------------------------------------|--------------------------------------------------------------------------------------------------------------------------------------------------------------------------------------------------------------------------------------------------------------------------------------------------------------------------------------------------------------------------------------------------------------------|-------------------------------------------------------------------------------------|-------|----------------------------------------------------------------------------------------|-------|-----------------------------------------------------------------------------------|-------|--|
| 4                                                                                      | Consulting fees                                                                                              | <input checked="" type="checkbox"/> None<br><br><table border="1"><tr><td></td><td></td></tr><tr><td></td><td></td></tr><tr><td></td><td></td></tr></table>                                                                                                                                                                                                                                                        |                                                                                     |       |                                                                                        |       |                                                                                   |       |  |
|                                                                                        |                                                                                                              |                                                                                                                                                                                                                                                                                                                                                                                                                    |                                                                                     |       |                                                                                        |       |                                                                                   |       |  |
|                                                                                        |                                                                                                              |                                                                                                                                                                                                                                                                                                                                                                                                                    |                                                                                     |       |                                                                                        |       |                                                                                   |       |  |
|                                                                                        |                                                                                                              |                                                                                                                                                                                                                                                                                                                                                                                                                    |                                                                                     |       |                                                                                        |       |                                                                                   |       |  |
| 5                                                                                      | Payment or honoraria for lectures, presentations, speakers bureaus, manuscript writing or educational events | <input checked="" type="checkbox"/> None<br><br><table border="1"><tr><td></td><td></td></tr><tr><td></td><td></td></tr></table>                                                                                                                                                                                                                                                                                   |                                                                                     |       |                                                                                        |       |                                                                                   |       |  |
|                                                                                        |                                                                                                              |                                                                                                                                                                                                                                                                                                                                                                                                                    |                                                                                     |       |                                                                                        |       |                                                                                   |       |  |
|                                                                                        |                                                                                                              |                                                                                                                                                                                                                                                                                                                                                                                                                    |                                                                                     |       |                                                                                        |       |                                                                                   |       |  |
| 6                                                                                      | Payment for expert testimony                                                                                 | <input checked="" type="checkbox"/> None<br><br><table border="1"><tr><td></td><td></td></tr><tr><td></td><td></td></tr></table>                                                                                                                                                                                                                                                                                   |                                                                                     |       |                                                                                        |       |                                                                                   |       |  |
|                                                                                        |                                                                                                              |                                                                                                                                                                                                                                                                                                                                                                                                                    |                                                                                     |       |                                                                                        |       |                                                                                   |       |  |
|                                                                                        |                                                                                                              |                                                                                                                                                                                                                                                                                                                                                                                                                    |                                                                                     |       |                                                                                        |       |                                                                                   |       |  |
| 7                                                                                      | Support for attending meetings and/or travel                                                                 | <input checked="" type="checkbox"/> None<br><br><table border="1"><tr><td></td><td></td></tr><tr><td></td><td></td></tr></table>                                                                                                                                                                                                                                                                                   |                                                                                     |       |                                                                                        |       |                                                                                   |       |  |
|                                                                                        |                                                                                                              |                                                                                                                                                                                                                                                                                                                                                                                                                    |                                                                                     |       |                                                                                        |       |                                                                                   |       |  |
|                                                                                        |                                                                                                              |                                                                                                                                                                                                                                                                                                                                                                                                                    |                                                                                     |       |                                                                                        |       |                                                                                   |       |  |
| 8                                                                                      | Patents planned, issued or pending                                                                           | <input checked="" type="checkbox"/> None<br><br><table border="1"><tr><td></td><td></td></tr><tr><td></td><td></td></tr></table>                                                                                                                                                                                                                                                                                   |                                                                                     |       |                                                                                        |       |                                                                                   |       |  |
|                                                                                        |                                                                                                              |                                                                                                                                                                                                                                                                                                                                                                                                                    |                                                                                     |       |                                                                                        |       |                                                                                   |       |  |
|                                                                                        |                                                                                                              |                                                                                                                                                                                                                                                                                                                                                                                                                    |                                                                                     |       |                                                                                        |       |                                                                                   |       |  |
| 9                                                                                      | Participation on a Data Safety Monitoring Board or Advisory Board                                            | <input type="checkbox"/> None<br><br><table border="1"><tr><td>Mass General Alzheimer's Disease Research Center External Advisory Committee</td><td>To me</td></tr><tr><td>University of Kentucky Alzheimer's Disease Research Center External Advisory Committee</td><td>To me</td></tr><tr><td>Boston University Alzheimer's Disease Research Center External Advisory Committee</td><td>To me</td></tr></table> | Mass General Alzheimer's Disease Research Center External Advisory Committee        | To me | University of Kentucky Alzheimer's Disease Research Center External Advisory Committee | To me | Boston University Alzheimer's Disease Research Center External Advisory Committee | To me |  |
| Mass General Alzheimer's Disease Research Center External Advisory Committee           | To me                                                                                                        |                                                                                                                                                                                                                                                                                                                                                                                                                    |                                                                                     |       |                                                                                        |       |                                                                                   |       |  |
| University of Kentucky Alzheimer's Disease Research Center External Advisory Committee | To me                                                                                                        |                                                                                                                                                                                                                                                                                                                                                                                                                    |                                                                                     |       |                                                                                        |       |                                                                                   |       |  |
| Boston University Alzheimer's Disease Research Center External Advisory Committee      | To me                                                                                                        |                                                                                                                                                                                                                                                                                                                                                                                                                    |                                                                                     |       |                                                                                        |       |                                                                                   |       |  |
| 10                                                                                     | Leadership or fiduciary role in other board, society, committee or advocacy group, paid or unpaid            | <input type="checkbox"/> None<br><br><table border="1"><tr><td>Wiley (Annals of Neurology)</td><td>To me</td></tr><tr><td></td><td></td></tr></table>                                                                                                                                                                                                                                                              | Wiley (Annals of Neurology)                                                         | To me |                                                                                        |       |                                                                                   |       |  |
| Wiley (Annals of Neurology)                                                            | To me                                                                                                        |                                                                                                                                                                                                                                                                                                                                                                                                                    |                                                                                     |       |                                                                                        |       |                                                                                   |       |  |
|                                                                                        |                                                                                                              |                                                                                                                                                                                                                                                                                                                                                                                                                    |                                                                                     |       |                                                                                        |       |                                                                                   |       |  |



|    |                                                                                  | Name all entities with whom you have this relationship or indicate none (add rows as needed) | Specifications/Comments (e.g., if payments were made to you or to your institution) |
|----|----------------------------------------------------------------------------------|----------------------------------------------------------------------------------------------|-------------------------------------------------------------------------------------|
| 11 | Stock or stock options                                                           | <input checked="" type="checkbox"/> None                                                     |                                                                                     |
|    |                                                                                  |                                                                                              |                                                                                     |
|    |                                                                                  |                                                                                              |                                                                                     |
|    |                                                                                  |                                                                                              |                                                                                     |
| 12 | Receipt of equipment, materials, drugs, medical writing, gifts or other services | <input checked="" type="checkbox"/> None                                                     |                                                                                     |
|    |                                                                                  |                                                                                              |                                                                                     |
|    |                                                                                  |                                                                                              |                                                                                     |
|    |                                                                                  |                                                                                              |                                                                                     |
| 13 | Other financial or non-financial interests                                       | <input checked="" type="checkbox"/> None                                                     |                                                                                     |
|    |                                                                                  |                                                                                              |                                                                                     |
|    |                                                                                  |                                                                                              |                                                                                     |
|    |                                                                                  |                                                                                              |                                                                                     |

Please place an "X" next to the following statement to indicate your agreement:

I certify that I have answered every question and have not altered the wording of any of the questions on this form.

## ICMJE DISCLOSURE FORM

**Date:** 4/15/2024

**Your Name:** Hiroko H. Dodge

**Manuscript Title:** Pathways to Personalized Medicine - Embracing Heterogeneity for Progress in Clinical Therapeutics Research in Alzheimer's Disease

**Manuscript Number (if known):** ADJ-D-24-00336

In the interest of transparency, we ask you to disclose all relationships/activities/interests listed below that are related to the content of your manuscript. "Related" means any relation with for-profit or not-for-profit third parties whose interests may be affected by the content of the manuscript. Disclosure represents a commitment to transparency and does not necessarily indicate a bias. If you are in doubt about whether to list a relationship/activity/interest, it is preferable that you do so.

The author's relationships/activities/interests should be defined broadly. For example, if your manuscript pertains to the epidemiology of hypertension, you should declare all relationships with manufacturers of antihypertensive medication, even if that medication is not mentioned in the manuscript.

In item #1 below, report all support for the work reported in this manuscript without time limit. For all other items, the time frame for disclosure is the past 36 months.

|                                                                                                                                                                                                                                                                                  | Name all entities with whom you have this relationship or indicate none (add rows as needed)                                                                                   | Specifications/Comments (e.g., if payments were made to you or to your institution)                                                                                                                                                                                                                                                                                                                                                                                                                                                                                                             |                                                                                                                                                                                                                                                                                  |             |  |  |                                           |  |
|----------------------------------------------------------------------------------------------------------------------------------------------------------------------------------------------------------------------------------------------------------------------------------|--------------------------------------------------------------------------------------------------------------------------------------------------------------------------------|-------------------------------------------------------------------------------------------------------------------------------------------------------------------------------------------------------------------------------------------------------------------------------------------------------------------------------------------------------------------------------------------------------------------------------------------------------------------------------------------------------------------------------------------------------------------------------------------------|----------------------------------------------------------------------------------------------------------------------------------------------------------------------------------------------------------------------------------------------------------------------------------|-------------|--|--|-------------------------------------------|--|
| Time frame: Since the initial planning of the work                                                                                                                                                                                                                               |                                                                                                                                                                                |                                                                                                                                                                                                                                                                                                                                                                                                                                                                                                                                                                                                 |                                                                                                                                                                                                                                                                                  |             |  |  |                                           |  |
| <b>1</b>                                                                                                                                                                                                                                                                         | All support for the present manuscript (e.g., funding, provision of study materials, medical writing, article processing charges, etc.)<br><b>No time limit for this item.</b> | <input checked="" type="checkbox"/> <b>None</b><br><table border="1" style="width: 100%; border-collapse: collapse; margin-top: 10px;"> <tr> <td style="width: 80%; height: 20px;"></td> <td style="width: 20%;">Institution</td> </tr> <tr> <td style="height: 20px;"></td> <td></td> </tr> <tr> <td colspan="2" style="text-align: right; font-size: small;">Click the tab key to add additional rows.</td> </tr> </table>                                                                                                                                                                    |                                                                                                                                                                                                                                                                                  | Institution |  |  | Click the tab key to add additional rows. |  |
|                                                                                                                                                                                                                                                                                  | Institution                                                                                                                                                                    |                                                                                                                                                                                                                                                                                                                                                                                                                                                                                                                                                                                                 |                                                                                                                                                                                                                                                                                  |             |  |  |                                           |  |
|                                                                                                                                                                                                                                                                                  |                                                                                                                                                                                |                                                                                                                                                                                                                                                                                                                                                                                                                                                                                                                                                                                                 |                                                                                                                                                                                                                                                                                  |             |  |  |                                           |  |
| Click the tab key to add additional rows.                                                                                                                                                                                                                                        |                                                                                                                                                                                |                                                                                                                                                                                                                                                                                                                                                                                                                                                                                                                                                                                                 |                                                                                                                                                                                                                                                                                  |             |  |  |                                           |  |
| Time frame: past 36 months                                                                                                                                                                                                                                                       |                                                                                                                                                                                |                                                                                                                                                                                                                                                                                                                                                                                                                                                                                                                                                                                                 |                                                                                                                                                                                                                                                                                  |             |  |  |                                           |  |
| <b>2</b>                                                                                                                                                                                                                                                                         | Grants or contracts from any entity (if not indicated in item #1 above).                                                                                                       | <input type="checkbox"/> <b>None</b><br><table border="1" style="width: 100%; border-collapse: collapse; margin-top: 10px;"> <tr> <td style="width: 80%; padding: 5px;">           FROM NIH:<br/>           R01AG051628, R01AG056102, RF1AG072449, RF1AG069782, RF1AG081413, R01AG056712, U2CAG054397, P30AG008017, P30AG053760, R01AG042191, P01AG043362, R01AG043398, U01NS100611, U2CAG057441, U01NS106670, R01AG054484, R01AG058687, P30 AG024978, R01AG042191, R01AG038651         </td> <td style="width: 20%;"></td> </tr> <tr> <td style="height: 20px;"></td> <td></td> </tr> </table> | FROM NIH:<br>R01AG051628, R01AG056102, RF1AG072449, RF1AG069782, RF1AG081413, R01AG056712, U2CAG054397, P30AG008017, P30AG053760, R01AG042191, P01AG043362, R01AG043398, U01NS100611, U2CAG057441, U01NS106670, R01AG054484, R01AG058687, P30 AG024978, R01AG042191, R01AG038651 |             |  |  |                                           |  |
| FROM NIH:<br>R01AG051628, R01AG056102, RF1AG072449, RF1AG069782, RF1AG081413, R01AG056712, U2CAG054397, P30AG008017, P30AG053760, R01AG042191, P01AG043362, R01AG043398, U01NS100611, U2CAG057441, U01NS106670, R01AG054484, R01AG058687, P30 AG024978, R01AG042191, R01AG038651 |                                                                                                                                                                                |                                                                                                                                                                                                                                                                                                                                                                                                                                                                                                                                                                                                 |                                                                                                                                                                                                                                                                                  |             |  |  |                                           |  |
|                                                                                                                                                                                                                                                                                  |                                                                                                                                                                                |                                                                                                                                                                                                                                                                                                                                                                                                                                                                                                                                                                                                 |                                                                                                                                                                                                                                                                                  |             |  |  |                                           |  |

|                                                                                                                                                                                                                                                                                       |                                                                                                              | Name all entities with whom you have this relationship or indicate none (add rows as needed)                                                                                                                                                                                                                                                                                                                                                                                                | Specifications/Comments (e.g., if payments were made to you or to your institution)                                                                                                                                                                                                   |  |               |  |                                                                  |  |  |  |  |
|---------------------------------------------------------------------------------------------------------------------------------------------------------------------------------------------------------------------------------------------------------------------------------------|--------------------------------------------------------------------------------------------------------------|---------------------------------------------------------------------------------------------------------------------------------------------------------------------------------------------------------------------------------------------------------------------------------------------------------------------------------------------------------------------------------------------------------------------------------------------------------------------------------------------|---------------------------------------------------------------------------------------------------------------------------------------------------------------------------------------------------------------------------------------------------------------------------------------|--|---------------|--|------------------------------------------------------------------|--|--|--|--|
| 3                                                                                                                                                                                                                                                                                     | Royalties or licenses                                                                                        | <input checked="" type="checkbox"/> <b>None</b><br><table border="1" style="width: 100%; border-collapse: collapse;"> <tr><td style="width: 50%; height: 20px;"></td><td style="width: 50%;"></td></tr> <tr><td style="height: 20px;"></td><td></td></tr> <tr><td style="height: 20px;"></td><td></td></tr> </table>                                                                                                                                                                        |                                                                                                                                                                                                                                                                                       |  |               |  |                                                                  |  |  |  |  |
|                                                                                                                                                                                                                                                                                       |                                                                                                              |                                                                                                                                                                                                                                                                                                                                                                                                                                                                                             |                                                                                                                                                                                                                                                                                       |  |               |  |                                                                  |  |  |  |  |
|                                                                                                                                                                                                                                                                                       |                                                                                                              |                                                                                                                                                                                                                                                                                                                                                                                                                                                                                             |                                                                                                                                                                                                                                                                                       |  |               |  |                                                                  |  |  |  |  |
|                                                                                                                                                                                                                                                                                       |                                                                                                              |                                                                                                                                                                                                                                                                                                                                                                                                                                                                                             |                                                                                                                                                                                                                                                                                       |  |               |  |                                                                  |  |  |  |  |
| 4                                                                                                                                                                                                                                                                                     | Consulting fees                                                                                              | <input type="checkbox"/> <b>None</b><br><table border="1" style="width: 100%; border-collapse: collapse;"> <tr><td style="width: 50%; height: 20px;">Northwestern ADRC</td><td style="width: 50%;"></td></tr> <tr><td style="height: 20px;">Florida1 ADRC</td><td></td></tr> <tr><td style="height: 20px;">Centers of Biomedical Research Excellence (COBRE) at U of Hawaii</td><td></td></tr> <tr><td style="height: 20px;"></td><td></td></tr> </table>                                   | Northwestern ADRC                                                                                                                                                                                                                                                                     |  | Florida1 ADRC |  | Centers of Biomedical Research Excellence (COBRE) at U of Hawaii |  |  |  |  |
| Northwestern ADRC                                                                                                                                                                                                                                                                     |                                                                                                              |                                                                                                                                                                                                                                                                                                                                                                                                                                                                                             |                                                                                                                                                                                                                                                                                       |  |               |  |                                                                  |  |  |  |  |
| Florida1 ADRC                                                                                                                                                                                                                                                                         |                                                                                                              |                                                                                                                                                                                                                                                                                                                                                                                                                                                                                             |                                                                                                                                                                                                                                                                                       |  |               |  |                                                                  |  |  |  |  |
| Centers of Biomedical Research Excellence (COBRE) at U of Hawaii                                                                                                                                                                                                                      |                                                                                                              |                                                                                                                                                                                                                                                                                                                                                                                                                                                                                             |                                                                                                                                                                                                                                                                                       |  |               |  |                                                                  |  |  |  |  |
|                                                                                                                                                                                                                                                                                       |                                                                                                              |                                                                                                                                                                                                                                                                                                                                                                                                                                                                                             |                                                                                                                                                                                                                                                                                       |  |               |  |                                                                  |  |  |  |  |
| 5                                                                                                                                                                                                                                                                                     | Payment or honoraria for lectures, presentations, speakers bureaus, manuscript writing or educational events | <input type="checkbox"/> <b>None</b><br><table border="1" style="width: 100%; border-collapse: collapse;"> <tr><td style="width: 50%; height: 20px;">IMPACT-AD workshop supported by ACTC</td><td style="width: 50%;"></td></tr> <tr><td style="height: 20px;"></td><td></td></tr> <tr><td style="height: 20px;"></td><td></td></tr> </table>                                                                                                                                               | IMPACT-AD workshop supported by ACTC                                                                                                                                                                                                                                                  |  |               |  |                                                                  |  |  |  |  |
| IMPACT-AD workshop supported by ACTC                                                                                                                                                                                                                                                  |                                                                                                              |                                                                                                                                                                                                                                                                                                                                                                                                                                                                                             |                                                                                                                                                                                                                                                                                       |  |               |  |                                                                  |  |  |  |  |
|                                                                                                                                                                                                                                                                                       |                                                                                                              |                                                                                                                                                                                                                                                                                                                                                                                                                                                                                             |                                                                                                                                                                                                                                                                                       |  |               |  |                                                                  |  |  |  |  |
|                                                                                                                                                                                                                                                                                       |                                                                                                              |                                                                                                                                                                                                                                                                                                                                                                                                                                                                                             |                                                                                                                                                                                                                                                                                       |  |               |  |                                                                  |  |  |  |  |
| 6                                                                                                                                                                                                                                                                                     | Payment for expert testimony                                                                                 | <input checked="" type="checkbox"/> <b>None</b><br><table border="1" style="width: 100%; border-collapse: collapse;"> <tr><td style="width: 50%; height: 20px;"></td><td style="width: 50%;"></td></tr> <tr><td style="height: 20px;"></td><td></td></tr> <tr><td style="height: 20px;"></td><td></td></tr> </table>                                                                                                                                                                        |                                                                                                                                                                                                                                                                                       |  |               |  |                                                                  |  |  |  |  |
|                                                                                                                                                                                                                                                                                       |                                                                                                              |                                                                                                                                                                                                                                                                                                                                                                                                                                                                                             |                                                                                                                                                                                                                                                                                       |  |               |  |                                                                  |  |  |  |  |
|                                                                                                                                                                                                                                                                                       |                                                                                                              |                                                                                                                                                                                                                                                                                                                                                                                                                                                                                             |                                                                                                                                                                                                                                                                                       |  |               |  |                                                                  |  |  |  |  |
|                                                                                                                                                                                                                                                                                       |                                                                                                              |                                                                                                                                                                                                                                                                                                                                                                                                                                                                                             |                                                                                                                                                                                                                                                                                       |  |               |  |                                                                  |  |  |  |  |
| 7                                                                                                                                                                                                                                                                                     | Support for attending meetings and/or travel                                                                 | <input checked="" type="checkbox"/> <b>None</b><br><table border="1" style="width: 100%; border-collapse: collapse;"> <tr><td style="width: 50%; height: 20px;"></td><td style="width: 50%;"></td></tr> <tr><td style="height: 20px;"></td><td></td></tr> <tr><td style="height: 20px;"></td><td></td></tr> </table>                                                                                                                                                                        |                                                                                                                                                                                                                                                                                       |  |               |  |                                                                  |  |  |  |  |
|                                                                                                                                                                                                                                                                                       |                                                                                                              |                                                                                                                                                                                                                                                                                                                                                                                                                                                                                             |                                                                                                                                                                                                                                                                                       |  |               |  |                                                                  |  |  |  |  |
|                                                                                                                                                                                                                                                                                       |                                                                                                              |                                                                                                                                                                                                                                                                                                                                                                                                                                                                                             |                                                                                                                                                                                                                                                                                       |  |               |  |                                                                  |  |  |  |  |
|                                                                                                                                                                                                                                                                                       |                                                                                                              |                                                                                                                                                                                                                                                                                                                                                                                                                                                                                             |                                                                                                                                                                                                                                                                                       |  |               |  |                                                                  |  |  |  |  |
| 8                                                                                                                                                                                                                                                                                     | Patents planned, issued or pending                                                                           | <input checked="" type="checkbox"/> <b>None</b><br><table border="1" style="width: 100%; border-collapse: collapse;"> <tr><td style="width: 50%; height: 20px;"></td><td style="width: 50%;"></td></tr> <tr><td style="height: 20px;"></td><td></td></tr> <tr><td style="height: 20px;"></td><td></td></tr> </table>                                                                                                                                                                        |                                                                                                                                                                                                                                                                                       |  |               |  |                                                                  |  |  |  |  |
|                                                                                                                                                                                                                                                                                       |                                                                                                              |                                                                                                                                                                                                                                                                                                                                                                                                                                                                                             |                                                                                                                                                                                                                                                                                       |  |               |  |                                                                  |  |  |  |  |
|                                                                                                                                                                                                                                                                                       |                                                                                                              |                                                                                                                                                                                                                                                                                                                                                                                                                                                                                             |                                                                                                                                                                                                                                                                                       |  |               |  |                                                                  |  |  |  |  |
|                                                                                                                                                                                                                                                                                       |                                                                                                              |                                                                                                                                                                                                                                                                                                                                                                                                                                                                                             |                                                                                                                                                                                                                                                                                       |  |               |  |                                                                  |  |  |  |  |
| 9                                                                                                                                                                                                                                                                                     | Participation on a Data Safety Monitoring Board or Advisory Board                                            | <input type="checkbox"/> <b>None</b><br><table border="1" style="width: 100%; border-collapse: collapse;"> <tr><td style="width: 50%; height: 100px;">Data Safety Monitoring Board member for the following trials: US POINTER (Protect Brain Health Through Lifestyle Intervention to Reduce Risk, PI: Laura Barker), RAATE (Reducing African Americans' Alzheimer's Disease Risk Through Exercise, PI: Robert Newton), BEST-AD (the Brain</td><td style="width: 50%;"></td></tr> </table> | Data Safety Monitoring Board member for the following trials: US POINTER (Protect Brain Health Through Lifestyle Intervention to Reduce Risk, PI: Laura Barker), RAATE (Reducing African Americans' Alzheimer's Disease Risk Through Exercise, PI: Robert Newton), BEST-AD (the Brain |  |               |  |                                                                  |  |  |  |  |
| Data Safety Monitoring Board member for the following trials: US POINTER (Protect Brain Health Through Lifestyle Intervention to Reduce Risk, PI: Laura Barker), RAATE (Reducing African Americans' Alzheimer's Disease Risk Through Exercise, PI: Robert Newton), BEST-AD (the Brain |                                                                                                              |                                                                                                                                                                                                                                                                                                                                                                                                                                                                                             |                                                                                                                                                                                                                                                                                       |  |               |  |                                                                  |  |  |  |  |

|           |                                                                                                   | Name all entities with whom you have this relationship or indicate none (add rows as needed)                                                                      | Specifications/Comments (e.g., if payments were made to you or to your institution) |
|-----------|---------------------------------------------------------------------------------------------------|-------------------------------------------------------------------------------------------------------------------------------------------------------------------|-------------------------------------------------------------------------------------|
|           |                                                                                                   | Energy for Amyloid Transformation in AD, PI: Suzanne Craft) and Stomp-AD (Senolytic Therapy to Modulate the Progression of Alzheimer's Disease, PI: Miranda Orr). |                                                                                     |
|           |                                                                                                   |                                                                                                                                                                   |                                                                                     |
|           |                                                                                                   |                                                                                                                                                                   |                                                                                     |
| <b>10</b> | Leadership or fiduciary role in other board, society, committee or advocacy group, paid or unpaid | <input type="checkbox"/> <b>None</b>                                                                                                                              |                                                                                     |
|           |                                                                                                   | ISTAART Advisory Committee member (2018-2021)                                                                                                                     |                                                                                     |
|           |                                                                                                   | ISTAART Clinical Trials Method PIA founding chair (2017-2020)                                                                                                     |                                                                                     |
|           |                                                                                                   |                                                                                                                                                                   |                                                                                     |
| <b>11</b> | Stock or stock options                                                                            | <input checked="" type="checkbox"/> <b>None</b>                                                                                                                   |                                                                                     |
|           |                                                                                                   |                                                                                                                                                                   |                                                                                     |
|           |                                                                                                   |                                                                                                                                                                   |                                                                                     |
|           |                                                                                                   |                                                                                                                                                                   |                                                                                     |
| <b>12</b> | Receipt of equipment, materials, drugs, medical writing, gifts or other services                  | <input checked="" type="checkbox"/> <b>None</b>                                                                                                                   |                                                                                     |
|           |                                                                                                   |                                                                                                                                                                   |                                                                                     |
|           |                                                                                                   |                                                                                                                                                                   |                                                                                     |
|           |                                                                                                   |                                                                                                                                                                   |                                                                                     |
| <b>13</b> | Other financial or non-financial interests                                                        | <input checked="" type="checkbox"/> <b>None</b>                                                                                                                   |                                                                                     |
|           |                                                                                                   |                                                                                                                                                                   |                                                                                     |
|           |                                                                                                   |                                                                                                                                                                   |                                                                                     |
|           |                                                                                                   |                                                                                                                                                                   |                                                                                     |

**Please place an "X" next to the following statement to indicate your agreement:**

I certify that I have answered every question and have not altered the wording of any of the questions on this form.
